# A High-Throughput Extraction and Analysis Method for Steroidal Glycoalkaloids in Tomato

Michael P. Dzakovich<sup>1</sup>, Jordan L. Hartman<sup>1</sup>, and Jessica L. Cooperstone<sup>1,2\*</sup>

<sup>1</sup>Department of Horticulture and Crop Science, The Ohio State University, 2001 Fyffe Court, Columbus, OH 43210

<sup>2</sup>Department of Food Science and Technology, The Ohio State University, 2015 Fyffe Court., Columbus, OH 43210

## \*Correspondence:

Dr. Jessica L. Cooperstone  
(Cooperstone.1@osu.edu)

**Keywords:** *Solanum lycopersicum*, *Solanum lycopersicum* var. *cerasiforme*, *Solanum pimpinellifolium*, phenotyping, alpha-tomatine, tomatidine, esculeoside, lycopersoside

## Abstract

Tomato steroidal glycoalkaloids (tSGAs) are a class of cholesterol-derived metabolites uniquely produced by the tomato clade. These compounds provide protection against biotic stress due to their fungicidal and insecticidal properties. Although commonly reported as being anti-nutritional, both *in vitro* as well as pre-clinical animal studies have indicated that some tSGAs may have a beneficial impact on human health. However, the paucity of quantitative extraction and analysis methods presents a major obstacle for determining the biological and nutritional functions of tSGAs. To address this problem, we developed and validated the first comprehensive extraction and UHPLC-MS/MS quantification method for tSGAs. Our extraction method allows for up to 16 samples to be extracted simultaneously in 20 minutes with  $93.0 \pm 6.8\%$  and  $100.8 \pm 13.1\%$  recovery rates for tomatidine and alpha-tomatine, respectively. Our ultra-high-performance liquid chromatography tandem mass spectrometry (UHPLC-MS/MS) method was able to chromatographically separate analytes derived from 16 tSGAs representing 9 different tSGA masses, as well as two internal standards, in 13 minutes. Tomato steroidal glycoalkaloids that did not have available standards were annotated using high resolution mass spectrometry as well as product ion scans that provided fragmentation data. Lastly, we utilized our method to survey a variety of commonly consumed tomato-based products. Total tSGA concentrations ranged from 0.7 to 3.4 mg/serving and represent some of the first reported tSGA concentrations in tomato-based products. Our validation studies indicate that our method is sensitive, robust, and able to be used for a variety of applications where concentrations of biologically relevant tSGAs need to be quantified.

## 41 **1 Introduction**

42 Solanaceous plants produce a spectrum of cholesterol derived compounds called steroidal  
43 glycoalkaloids. While each solanaceous clade produces its own unique assortment of steroidal  
44 glycoalkaloids, these metabolites share commonality in their role as phytoanticipins and anti-  
45 herbivory agents (Etalo et al., 2015; Fontaine et al., 1948; Irving et al., 1945; Ökmen et al., 2013).  
46 Tomato (*Solanum lycopersicum* and close relatives) is no exception, and over 100 tomato steroidal  
47 glycoalkaloids (tSGAs, Fig. 1) have been suggested (Iijima et al., 2013, 2008). Although these  
48 compounds are typically reported as anti-nutritional (Ballester et al., 2016; Cárdenas et al., 2016,  
49 2015; Itkin et al., 2013), other studies suggest a health-promoting role. In fact, emerging evidence  
50 suggests that some tSGAs may play a role in positive health outcomes associated with tomato  
51 consumption (Cayen, 1971; Choi et al., 2012; Cooperstone et al., 2017; Lee et al., 2004). While  
52 these compounds continue to be evaluated both *in planta* and *in vivo*, there is a lack of quantitative  
53 and validated methods to extract and measure tSGAs from tomatoes; a critical need for additional  
54 research in this area.

55 Tomato steroidal glycoalkaloids are typically extracted by grinding individual samples  
56 using a mortar and pestle, or blender and then solubilizing analytes with polar solvent systems,  
57 typically methanol. This approach is time consuming because each sample is handled individually.  
58 Additionally, this technique has been used for relative profiling, and has not been evaluated for its  
59 ability to extract tSGAs quantitatively. Tomato steroidal glycoalkaloids such as alpha-tomatine,  
60 have previously been quantified using gas and liquid chromatography (Kozukue and Friedman,  
61 2003; Lawson et al., 1992; Rick et al., 1994), as well as a number of bioassays including cellular  
62 agglutination (Schlösser and Gottlieb, 1966) and radioligand assays using radioactive cholesterol  
63 (Eltayeb and Roddick, 1984). These methods are unreliable, suffer from poor sensitivity, have  
64 poor selectivity for different alkaloids, and are time consuming. Recent advances in analytical  
65 chemistry have enabled researchers to discover other tSGA species in tomato fruits using high  
66 resolution mass spectrometry (Iijima et al., 2013, 2008; Zhu et al., 2018), however these methods  
67 are qualitative. A small number of quantitative methods using mass spectrometry have been  
68 developed, but only for individual or few of tSGAs (Baldina et al., 2016; Caprioli et al., 2014).  
69 Thus, there is a need to develop validated extraction and quantification methods in order to  
70 continue to study the role these compounds have in both plant and human health.

71 To address the lack of suitable approaches to extract and quantify tSGAs, we developed  
72 and validated a high-throughput extraction and ultra-high-performance liquid chromatography  
73 tandem mass spectrometry (UHPLC-MS/MS) method suitable for tomato and tomato-based  
74 products. Our extraction method is able to process 16 samples in parallel in 20 minutes (1.25  
75 min/sample) and our UHPLC-MS/MS method can chromatographically separate, detect, and  
76 quantify 16 tSGAs (using two external and two internal standards) representing 9 different tSGA  
77 masses (Fig. 2) in 13 minutes per sample. This is the first comprehensive targeted method to  
78 quantify a broad panel of tSGAs. Here, we present the experiments used to develop and validate  
79 our method as well as an application providing baseline information of tSGA concentrations in  
80 commonly consumed tomato products.

81

## 82 **2 Materials and Methods**

83 *Reagents and standards:* Acetonitrile (LC-MS grade), formic acid (LC-MS grade), isopropanol  
84 (LC-MS grade), methanol (HPLC grade), and water (LC-MS grade) were purchased from Fisher

85 Scientific (Pittsburgh, PA). Alpha-tomatine ( $\geq 90\%$  purity) and solanidine ( $\geq 99\%$  purity) were  
86 purchased from Extrasynthese (Genay, France). Alpha-solanine ( $\geq 95\%$  purity) and tomatidine  
87 ( $\geq 95\%$  purity) were purchased from Sigma Aldrich (St. Louis, MO). Stock solutions were prepared  
88 by weighing each analyte into glass vials and dissolving into methanol prior to storage at  $-80\text{ }^{\circ}\text{C}$ .  
89 Standard curves were prepared by mixing 15 nmol of alpha-tomatine and 1 nmol of tomatidine in  
90 methanol. The solution was evaporated to dryness under a stream of ultra-high purity (5.0 grade)  
91 nitrogen gas. The dried residue was then resuspended in 900  $\mu\text{L}$  of methanol, briefly sonicated ( $\sim$   
92 5 s), and then diluted with an additional 900  $\mu\text{L}$  of water. An 8-point dilution series was then  
93 prepared, and analyte concentrations ranged from 3.81 pmol/mL to 8.34 nmol/mL (11.14  
94 femtomoles to 25 picomoles injected).

95  
96 To utilize alpha-solanine and solanidine as internal standards (IS), 1.25 nmol and 22.68  
97 pmol of alpha solanine and solanidine, respectively, were spiked into each vial of the alpha-  
98 tomatine/tomatidine external standard dilution series described above. The spike intensity of  
99 alpha-solanine and solanidine was determined by calculating the amount needed to achieve target  
100 peak areas of tSGAs typically seen in tomato samples.

101  
102 *Sample material:* For UHPLC-MS/MS and UHPLC-Quadrupole Time-of-Flight Mass  
103 Spectrometry (UHPLC-QTOF-MS) method development experiments, 36 unique accessions of  
104 tomato including *Solanum lycopersicum*, *Solanum lycopersicum* var. *cerasiforme*, and *Solanum*  
105 *pimpinellifolium* were combined and pureed to create a tomato reference material expected to span  
106 the diversity of tSGAs reported in nature. For spike-in recovery experiments, red-ripe processing-  
107 type tomatoes (OH8245; courtesy of David M. Francis) were diced, mixed together by hand, and  
108 stored at  $-20\text{ }^{\circ}\text{C}$  until analysis. Items used for the tomato product survey were purchased from  
109 supermarkets in Columbus, OH in July 2019. Three unique brands of tomato paste, tomato juice,  
110 diced tomatoes, whole peeled tomatoes, ketchup, pasta sauce, and tomato soup were analyzed for  
111 tSGAs. Additionally, four heirloom, two fresh-market, one processing, and one cherry variety of  
112 unprocessed tomatoes were also analyzed.

113  
114 *Extraction of tSGAs:* Five grams of diced OH8245 tomato ( $\pm 0.05\text{ g}$ ) were weighed in 50 mL  
115 falcon tubes. Two  $3/8'' \times 7/8''$  angled ceramic cutting stones (W.W. Grainger: Lake Forest, IL;  
116 Item no.: 5UJX2) were placed on top of the tomato sample and 100  $\mu\text{L}$  of internal standard was  
117 added, followed by 15 mL of methanol. Samples were then extracted for 5 minutes at 1400 RPM  
118 using a Geno/Grinder 2010 (SPEX Sample Prep: Metuchen, NJ). Sample tubes were immediately  
119 centrifuged for 5 minutes at  $3000 \times g$  and  $4\text{ }^{\circ}\text{C}$ . Two mL aliquots of supernatant from each sample  
120 were then transferred to glass vials and diluted with 1 mL of water. Samples were then filtered into  
121 LC vials using a  $0.22\text{ }\mu\text{m}$  nylon filter (CELLTREAT Scientific Products: Pepperell, MA).

122 Tomato products sourced from grocery stores were extracted as described above except  
123 fresh fruits of each type were blended in a coffee grinder prior to extraction. To account for  
124 differences in water content among the tomato products, 500  $\mu\text{L}$  aliquots from each sample were  
125 dried down under nitrogen gas, re-dissolved in 1.5 mL of 50% methanol, and filtered using a  $0.22\text{ }\mu\text{m}$   
126 filter prior to analysis.

127

128 *UHPLC-MS/MS Quantification of tSGAs:* Tomato steroidal glycoalkaloids were  
129 chromatographically separated on a Waters (Milford, MA) Acquity UHPLC H-Class System using  
130 a Waters C18 Acquity bridged ethylene hybrid (BEH) 2.1 x 100 mm, 1.7  $\mu$ m particle size column  
131 maintained at 40 °C. The autosampler compartment was maintained at 20 °C. A gradient method  
132 with Solvent A (water + 0.1% (v/v) formic acid) and Solvent B (Acetonitrile + 0.1% (v/v) formic  
133 acid) at a flow rate of 0.4 mL/min was utilized as follows: 95% A for 0.25 minutes, 95% A to 80%  
134 A for 1.0 minute, 80% A to 75% A for 2.5 minutes, 75% A held for 0.5 minutes, 75% A to 68%  
135 A for 1.7 minutes, 38% A to 15% A for 1.7 minutes, 0% A held for 3.0 minutes, and back to 95%  
136 A for 2.35 minutes to re-equilibrate the column. Each run lasted 13 minutes and the sample needle  
137 was washed for 10 seconds with 1:1 methanol:isopropanol before and after each injection to  
138 minimize carryover. Column eluent was directed into a Waters TQ Detector tandem mass  
139 spectrometer and source parameters and transitions can be found in Table 1. Dwell times were  
140 optimized for each analyte to allow for 12-15 points across each peak. Quantification was carried  
141 out using 6-8 point external calibration curves, depending on the extent of linearity for a given  
142 analyte. Relative quantification was used for tSGAs (quantified using alpha-tomatine) and their  
143 aglycones (quantified using tomatidine) that did not have commercially available standards.  
144 Additionally, signals were normalized to alpha-solanine and solanidine for glycosylated and  
145 aglycone analytes to correct for instrument variability.

146

147 *UHPLC-QTOF/MS Confirmation of tSGA Identities:* We verified the identities of our tSGA  
148 analytes using an Agilent 1290 Infinity II UHPLC coupled with an Agilent 6545 QTOF-MS.  
149 Identical column and chromatographic separation conditions were used as described above for our  
150 MS/MS method. The QTOF-MS used an electrospray ionization source operated in positive mode  
151 and data were collected from 50-1700  $m/z$  for both full-scan and MS/MS experiments. Gas  
152 temperature was set to 350 °C, drying gas flow was 10 L/min, nebulizer gas flow was 10 L/min,  
153 nebulizer was 35 psig, and sheath gas flow and temperature was 11 L/min and 375 °C, respectively.  
154 For MS/MS experiments on the QTOF-MS, identical parameters were used except for the selection  
155 of tSGA masses of interest and a two-minute retention time window around each analyte to  
156 maximize duty cycle of the instrument. Collision energy for all tSGAs was set to 70 eV and all  
157 aglycones were fragmented with 45 eV.

158

159 *Limit of Detection (LOD) and Limit of Quantification (LOQ):* Limit of detection and LOQ were  
160 calculated using six replicates of the lowest concentration standard curve calibrant sample (3.81  
161 and 0.254 femtomoles on column for alpha-tomatine and tomatidine, respectively) and  
162 determining their signal to noise ratios. Moles on column at 3/1 and 10/1 signal to noise were then  
163 determined for alpha-tomatine and tomatidine to calculate LOD and LOQ.

164

165 *Spike Recovery Experiments:* Ten, 5 g ( $\pm$  0.01 g) replicates of diced OH8245 processing tomatoes  
166 were weighed into 50 mL falcon tubes. Five samples were extracted as outlined previously with  
167 the addition of a 100  $\mu$ L methanolic solution containing 1.67 nmol of alpha-tomatine, 1.25 nmol  
168 of alpha solanine, 12.4 pmol of tomatidine, and 22.68 pmol of solanidine (spiked tomato) while  
169 another five samples were extracted without IS solution (non-spiked tomato; 100  $\mu$ L of methanol  
170 used in its place). The IS was allowed to integrate into the sample matrix for 30 min. Another set

171 of five samples were prepared by substituting tomato for 5 mL of water for tomato and extracted  
172 with the addition of 100  $\mu$ L of the methanolic IS solution mentioned previously (spiked mock  
173 sample). Percent recovery was estimated using the following equation:

$$174 \quad \text{Recovery (\%)} = \frac{\text{Spiked Tomato}}{\text{Non - spiked Tomato} + \text{Spiked Mock Sample}}$$

175  
176 *Intra/Interday Variability Experiments:* Eight OH8245 tomato fruits were blended together and 5  
177 g aliquots ( $\pm$  0.05 g) were distributed among 18, 50 mL tubes, and frozen at -20  $^{\circ}$ C. Over three  
178 days, six tubes were randomly selected from the freezer each day and tSGAs were extracted and  
179 quantified as outlined above by a single individual. Intraday variability was determined by  
180 computing the coefficient of variation for an analyte within a day. Interday variability was  
181 calculated by taking the coefficient of variation of all samples run over the three-day period.

182  
183 *Autosampler Stability Experiments:* A quality control sample containing multiple tomato species,  
184 as described, above was extracted with the addition of 100  $\mu$ L of IS solution as outlined previously.  
185 Over a period of 12 hours, the quality control sample was injected and analyzed by UHPLC-  
186 MS/MS at hourly intervals. The vial cap was replaced after each injection to prevent sample  
187 evaporation between injections and the autosampler compartment was maintained at 20  $^{\circ}$ C.

188  
189 **3 Results and Discussion:**

190 3.1 Development of High-Throughput Extraction and UHPLC-MS/MS Quantification  
191 Methods

192  
193 *Development of high-throughput extraction method:* Generally, tomato samples are pulverized in  
194 a mortar in the presence of liquid nitrogen or homogenized using a blender prior to extracting  
195 tSGAs. Tomato steroidal glycoalkaloids are considered semi-polar metabolites and are typically  
196 extracted via physical disruption in a methanolic solvent system (Ballester et al., 2016; Iijima et  
197 al., 2013, 2008; Mintz-Oron et al., 2008; Moco et al., 2006). Current methods are time consuming  
198 since each sample needs to be processed individually. Our protocol features a combined  
199 homogenization/extraction step using a Geno/Grinder system that can process up to 16 samples at  
200 once. Given a five-minute homogenization/extraction, five-minute centrifugation, and an  
201 approximately ten-minute dilution/filtration step, our extraction method can process 16 samples  
202 every 20 minutes (1.25 min/sample) making it ideal for screening large tomato populations or large  
203 sample sets of tomato products. Moreover, the tomato sample is able to stay frozen until the  
204 extraction begins which prevents potential enzymatic modification and degradation of analytes.

205  
206 *Selection of Precursor Ions:* Over 100 tSGAs have been tentatively identified in tomato using high-  
207 resolution mass spectrometry and some with MS/MS fragmentation (Iijima et al., 2013, 2008; Zhu  
208 et al., 2018). However, we do not know the specific concentrations of tSGA accumulating in fruits.  
209 To study tSGAs further, quantitative analysis methods are necessary. In order to maximize the



210 amount of tSGAs detected and separated in our method, we first compiled a target list of  
211 biologically relevant tSGAs by surveying the literature (Alseekh et al., 2015; Cichon et al., 2017;  
212 Cooperstone et al., 2017; Fujiwara et al., 2004; Hövelmann et al., 2019; Iijima et al., 2009; Zhu et  
213 al., 2018). Tomato steroidal glycoalkaloid species were prioritized based on their perceived  
214 abundance in the tomato clade, previous structural characterization, and having an established  
215 record of being impacted by or a part of biological processes such as ripening or plant defense,  
216 respectively. Using this process, 18 masses covering at least 25 different tSGA species were  
217 selected for chromatographic separation and quantification.

218 A 50% aqueous methanolic extract from a reference material comprised of red-ripe  
219 *Solanum lycopersicum*, *Solanum lycopersicum* var. *cerasiforme*, and *Solanum pimpinellifolium*  
220 fruits was used for method development on a Waters Acquity UHPLC H-Class System connected  
221 to a TQ Detector triple quadrupole mass spectrometer with electrospray ionization operated in  
222 positive ion mode. A gradient progressing from 5% to 100% acetonitrile over 15 minutes run on a  
223 Waters 2.1 x 100 mm (1.7  $\mu$ m particle size) column at 0.4 mL/min was used to separate as many  
224 potential analytes as possible. Selected Ion Recordings (SIRs) of masses of interest were utilized  
225 to identify potential tSGA species. Since only two alkaloids of interest are available commercially  
226 (alpha-tomatine and tomatidine), elution order, accurate mass, and fragmentation patterns were  
227 used to assign identity all other tSGAs. Source parameters of the MS were then adjusted to the  
228 maximize signal of both identified and tentatively identified tSGAs Those tSGAs which were  
229 readily detectable in our pooled tomato quality control samples were used in our final method.  
230 While studied more extensively than many other tSGAs, we were not able to detect and quantify  
231 beta-, gamma-, and delta-tomatine in our reference material.

232

233 *Use of Internal Standards:* We tested three, commercially available potato-derived alkaloids for  
234 their suitability as internal standards to correct for inter and intraday variability created in the MS.  
235 Alpha-solanine, alpha-chaconine, and solanidine (aglycone of alpha solanine) were selected based  
236 on their similarity in structure, ionization efficiencies and retention times to tomato-derived  
237 alkaloids. However, alpha-chaconine was excluded due to co-elution with alpha-tomatine. We  
238 determined 1.25 nmol and 22.68 pmol of alpha solanine and solanidine, respectively, should be  
239 added to each sample (41.7 femtomoles of alpha solanine and 0.756 femtomoles of solanidine on  
240 column) to achieved comparable peak areas to those observed for tSGAs and their aglycones such  
241 as tomatidine and tomatidenol (Fig. 2). Alpha-solanine and solanidine multiple reaction  
242 monitoring (MRMs) experiments were then optimized in tandem with tSGAs of interest as follows.

243

244 *Optimization of MS parameters:* Desolvation temperature, desolvation gas flow rate, and cone  
245 voltage were experimentally optimized. All other source parameters remained at their  
246 recommended default settings and are reported in the footer of (Table 1). For all experiments, vial  
247 caps were replaced after each injection to prevent any possible effects from evaporation through  
248 the pierced septa. To optimize the desolvation temperature, a 50% aqueous methanolic solution of  
249 alpha-tomatine and tomatidine was injected and desolvation temperatures ranging from 350 °C to  
250 500 °C at 25 °C increments were tested. A 500 °C desolvation temperature resulted in the highest  
251 signal. Desolvation gas flow was tested in a similar manner starting from 600 L/hr to 1000 L/hr in  
252 100 L/hr increments. Likewise, the 1000 L/h flow rate resulted in the most signal for both analytes.  
253 Alpha-tomatine and tomatidine were used in these experiments because of their commercial

254 availability, their structural similarity to other tSGAs of interest, and their intended use for relative  
255 quantification of all other tSGAs and their aglycones. Finally, cone voltage was optimized by  
256 injecting a 50% aqueous methanolic extract of our tomato reference material and measuring the  
257 signal of each SIR. Cone voltages ranged from 20 to 90 V and successive injections were made in  
258 5 V increments. Optimal cone voltages were specific to each mass and are notated in Table 1. With  
259 source parameters set to optimize the signal of all precursor ions of interest, product ion scans were  
260 then conducted to tentatively identify tSGAs and aid in the development of MRM experiments,  
261 which were ultimately used for quantification.

262 Since each SIR yielded multiple peaks, information from product ion scans was leveraged  
263 to determine if each peak was actually a tSGA. Product ion scan experiments were created for each  
264 mass of interest and multiple collision energies (20, 45, and 65 eV) were tested. The resulting  
265 spectra generated for each peak allowed us to eliminate peaks that were isobaric with tSGAs of  
266 interest, but had product ions inconsistent with proposed structures. Masses such as 254.9 and  
267 272.9  $m/z$  were particularly useful in identifying alkaloids as they are likely derived from the  
268 fragmentation of the steroidal backbone characteristic of all tSGAs (Supplementary Information)  
269 and have been previously reported in the literature (Caprioli et al., 2014; Cichon et al., 2017; Iijima  
270 et al., 2013; Sonawane et al., 2018; Zhu et al., 2018). Additionally, tSGAs with the prefix  
271 “dehydro” exhibit a desaturation on the B ring of the steroidal backbone between carbons 5 and 6  
272 (Iijima et al., 2013; Itkin et al., 2011; Ono et al., 1997; Sonawane et al., 2018). We observed that  
273 common fragments derived from the steroidal backbone of these alkaloids, such as 252.9 and  
274 270.8, were accordingly 2  $m/z$  less than their saturated counterparts. The 272.9 fragment  
275 corresponds to the A-D rings of the steroidal backbone and its corresponding water loss product  
276 (Sonawane et al., 2018). Elution order of analytes was used to help tentatively identify tSGAs  
277 detected in our reference sample based on previous reports (Alseekh et al., 2015; Zhu et al., 2018).  
278 Multiple collision energies allowed us to select product ions that were abundant and consistently  
279 produced under different conditions. These product ions then became candidate ions for MRM  
280 development.

281 MRM experiments allowed us to confidently detect and quantify tSGAs of interest and  
282 increase sensitivity by minimizing interference of co-eluting compounds. We created MRM  
283 experiments for each mass using optimized source conditions and four product ions with the  
284 highest signal/noise ratio. Initially, our 50% aqueous methanolic reference sample extract was  
285 injected and each transition was tested at 5 eV. The experiments were rerun at increasing collision  
286 energies at 15 eV increments up to 95 eV. Afterwards, a 20 eV window broken into 5 eV  
287 increments was determined for each transition and the experiments were re-run. Optimized MRMs  
288 are displayed in Table 1. To maximize duty cycle, two transitions with the best signal to noise ratio  
289 were retained. The gradient was then optimized to chromatograph each analyte. All tSGAs were  
290 quantified using a standard curve generated with alpha-tomatine while aglycone species used  
291 tomatidine. Due to the structural similarity among tSGA species quantified in our method, we  
292 hypothesize that ionization efficiencies will be similar amongst our analytes. Lastly, MRMs were  
293 developed for the potato derived alkaloids alpha-solanine and solanidine used as IS. These IS  
294 allowed us to correct for instrument derived variability that normally occurs with mass  
295 spectrometers.

296

297 *Development of Chromatographic Gradient:* Method development related to the MS was initially  
298 carried out using a simple 13-minute gradient outlined above. While this run time is shorter than  
299 many of the previously published studies characterizing tSGAs using high-resolution MS (Iijima  
300 et al., 2013, 2008; Zhu et al., 2018) we aimed to create a more efficient method that would be able  
301 to accommodate large sample sets. Of the two columns tested (Waters C18 Acquity bridged  
302 ethylene hybrid (BEH) 2.1 x 100 mm, 1.7  $\mu\text{m}$  and Waters C18 Acquity high strength silica (HSS)  
303 2.1 x 100 mm, 1.8  $\mu\text{m}$ ), the BEH column was able to better resolve analytes of interest with a  
304 particular benefit observed in the nonpolar aglycone steroidal alkaloids. We adjusted our gradient  
305 conditions in such a way that all separation of analytes occurred within a six-minute window with  
306 an additional five minutes devoted to cleaning and reequilibrating the column to reduce carryover  
307 (Fig. 2). Additionally, the needle wash was set to rinse the needle and injection port for ten seconds  
308 before and after an injection with 1:1 methanol:isopropanol to further reduce carryover. We  
309 observed multiple peaks for many of our masses indicating the presence of multiple isobaric tSGAs  
310 (likely including structural isomers) (Fig. 2). In the case of esculeoside B, multiple diastereomers  
311 have been previously reported in tomato products which explains our observation of multiple peaks  
312 for this analyte (Hövelmann et al., 2019; Manabe et al., 2013; Nohara et al., 2015). Validation  
313 experiments, including confirmation of peak identities using high-resolution mass spectrometry,  
314 were next carried out using the finalized chromatographic gradient.

315

### 316 3.2 Validation of Extraction and UHPLC-MS/MS Methods

317

318 *Confirmation of Analytes using High-Resolution Mass Spectrometry:* Accurate mass spectrometry  
319 was used to confirm the identities of analytes quantified by our UHPLC-MS/MS method. We  
320 transferred our method to an Agilent 1290 Infinity II connected to an Agilent 6545 QTOF and  
321 profiled tSGAs both in high resolution full scan mode (50-1700  $m/z$ ) and through targeted  
322 fragmentation experiments. Both types of experiments were consistent with our identities of all  
323 tSGAs and aglycones in our UHPLC-MS/MS method (Table 2). Retention times differed slightly  
324 between the UHPLC-MS/MS method and the UHPLC-QTOF-MS experiments due to differences  
325 in dead volume between the two instruments. However, relative elution order remained the same.

326 Targeted MS/MS experiments using the UHPLC-QTOF-MS allowed us to determine  
327 common spectral characteristics for each tSGA (Fig. 1 and Supplementary Information). Using  
328 commercially available alpha-tomatine and tomatidine and exploiting the presence of  
329 dehydrotomatine and tomatidenol (dehydrotomatine) as impurities within these standards, we were  
330 able to collect MS/MS fragmentation data on these four analytes. We found that all tSGAs and  
331 aglycones fragmented in predictable ways that allow for identification. Common masses produced  
332 by each tSGA in our method can be found in Table 2. These data allow us to tentatively identify  
333 all analytes in our UHPLC-MS/MS with a high degree of confidence.

334

335 *LOD and LOQ:* Previous chromatography-based methods to quantify both potato and tSGAs relied  
336 on photodiode array detectors and set 208 nm (Del Giudice et al., 2015; Kozukue et al., 2004;  
337 Kozukue and Friedman, 2003; Tajner-Czopek et al., 2014). Given that the molar extinction  
338 coefficient for alpha-tomatine is only 5000  $\text{M}^{-1}\text{cm}^{-1}$ , (Keukens et al., 1994), photodiode array  
339 detectors are not sensitive enough for detecting low quantities of these compounds, nor



340 distinguishing between different alkaloids. Moreover, photodiode array detectors are often set to  
341 200 nm to quantify tSGAs which is a non-specific wavelength where many compounds (including  
342 mobile phases) can absorb light (Friedman and Levin, 1998, 1992; Keukens et al., 1994). Mass  
343 spectrometers offer substantial gains in sensitivity through the use of MRM experiments and the  
344 ability to differentiate numerous analytes in a single run. Our UHPLC-MS/MS method for  
345 quantifying tSGAs was able to detect and quantify alpha-tomatine and tomatidine in the low  
346 femtomole-on-column range (Table 3). Given our extraction method, tSGAs could be present in  
347 picomolar concentrations in tomato and still be quantified.

348

349 *Spike Recovery:* Spike addition experiments were conducted to assess the performance of our high-  
350 throughput extraction method. Both tomato and potato derived external alkaloid standards were  
351 used to determine if our chosen internal standards would behave similarly to analytes native to  
352 tomato. Tomato alkaloids alpha-tomatine ( $100.8\% \pm 13.1$ ) and tomatidine ( $93\% \pm 6.8$ ) as well as  
353 the potato-derived internal standards alpha solanine ( $94.3\% \pm 3.4$ ) and solanidine ( $99.7\% \pm 7.1$ )  
354 were efficiently extracted using our method (Table 3). These data indicate that our method is able  
355 to effectively extract aglycone and glycosylated steroidal alkaloid species from tomato and our  
356 internal standards extract similarly to native analytes.

357

358 *Intra/Interday Variability:* Experiments to determine intra/interday variability were conducted to  
359 determine analytical variability in our extraction and analysis methods. A single operator extracted  
360 six tomato samples and analyzed them by UHPLC-MS/MS. This experiment was repeated twice  
361 more by the same operator. Our data indicate that our methods are reliable with most analytes  
362 having coefficient of variations for both intra and interday variability below 5% (Table 4). As  
363 expected, interday variability was higher than intraday variability for all analytes reflecting day-  
364 to-day variability in the MS.

365

366 *12-hour Stability Experiment:* Tomato phytochemicals typically analyzed, such as carotenoids, are  
367 subject to oxidation and need to be run in small batches to minimize experimental error due to  
368 degradation (Kopeck et al., 2012). However, relatively little is known about the stability of tSGAs  
369 compared to the above phytochemical classes. We hypothesized that due to the known heat  
370 stability of chemically analogous potato steroidal glycoalkaloids, extracted tSGAs would be stable  
371 over time. A 12-hour stability study demonstrated that both alpha-tomatine and tomatidine did not  
372 degrade over time in an autosampler maintained at 20 °C. While there is currently no published  
373 literature investigating the stability of tSGAs, some data exists in chemically analogous potato  
374 glycoalkaloids. Often, potato glycoalkaloids are often extracted at 100 °C temperatures to disrupt  
375 cell walls and otherwise weaken the sample matrix (Rodriguez-Saona et al., 1999) and processing  
376 studies have shown that these compounds are stable up to 180 °C (Chungcharoen, 1988).  
377 Therefore, tSGAs may also have similar heat tolerance attributes and we speculate that these  
378 analytes may remain unchanged in autosamplers well beyond the 12-hour time period we tested.

379

380 3.3 Application of Extraction and UHPLC-MS/MS Method

381

382 *Grocery Store Survey*: To test our extraction and quantification method, we surveyed several  
383 commonly consumed tomato-based products available at grocery stores. The purpose was twofold:  
384 to test applicability of our method, and to report comprehensive and quantitative values of tSGAs  
385 in commonly consumed tomato products. These products included an assortment of fresh  
386 tomatoes, ketchup, pasta sauce, pizza sauce, tomato soup, tomato paste, tomato juice, and whole  
387 peeled tomatoes (Table 5). Values are reported per serving to normalize between tomato products  
388 subjected to varying degrees of concentration. While there are some reports of tSGA  
389 concentrations in fresh tomatoes using modern methods (Baldina et al., 2016), concentrations in  
390 tomato-based products are not well reported in the literature. We found that tSGAs varied  
391 depending on type of product. High standard deviations likely reflect differences in geographic  
392 origin, harvest time, and processing conditions. Of note, many of our tSGAs varied by up to three  
393 orders of magnitude among different analytes and tomato products. This finding indicates a broad  
394 range of tSGA concentrations in tomato-based products.

395 Alpha-tomatine, the first tSGA in the biosynthesis pathway, was found to be in the highest  
396 concentration in processed tomato products such as paste, pasta sauce, and soup (Table 5). The  
397 discrepancy between fresh and whole peeled tomatoes is hypothesized to be due to genetic and  
398 environmental conditions that influenced the chemical profile of the tomatoes prior to processing.  
399 Analyte groups like dehydrolycoperoside F, G or A, lycopersides F, G, or esculeoside A and  
400 acetoxytomatine (commonly referred to as lycopersides A, B, or C) were not detectable in most  
401 tomato products except for some fresh varieties and ketchup. Interestingly, lycopersides F, G, or  
402 esculeoside A are typically the most abundant tSGA in fresh tomatoes. This observation raises  
403 questions about the effects of processing on tSGAs where few studies have been conducted to date  
404 (Tomas et al., 2017). While the chemically analogous potato glycoalkaloids are considered to be  
405 heat stable, high temperatures, pressures, and any combination thereof might be detrimental to  
406 some tSGAs or cause shifts in chemical profiles.

407 Concentrations of tSGAs in tomato products were normalized for serving size to  
408 contextualize how much might be ingested in a given meal. Other tomato phytochemicals, such as  
409 lycopene, tend to be found in concentrations ranging from 0.09 to 9.93 mg/100g FW in fresh  
410 tomatoes (Dzakovich et al., 2019). Compared to major carotenoids found in tomato, tSGA  
411 concentrations were comparable (0.7 to 3.4 mg/serving) (Cooperstone, 2020) This finding  
412 contradicts a long-standing misconception that tSGAs are degraded during ripening (Friedman,  
413 2002). Rather, tSGAs such as alpha-tomatine are biochemically transformed during ripening into  
414 glycosylated and acetylated forms. Overall, our methods were able to efficiently extract and  
415 analyze many types of tSGAs and generate the first quantitative concentration reports of these  
416 analytes in commonly consumed tomato products. Moreover, we found that tSGAs can be found  
417 in similar concentrations to other major phytochemicals in tomatoes such as carotenoids.

418 We have developed and described the first comprehensive extraction and analysis method  
419 for tSGAs. Our extraction method was able to quickly and efficiently extract tSGAs and allowed  
420 for high-throughput workflows (16 samples per ~20 min) to be utilized. Our UHPLC-MS/MS  
421 method was able to separate and quantify 16 tSGAs representing 9 different tSGA masses, as well  
422 as two internal standards, in 13 minutes. Limits of quantification for commercially available tSGAs  
423 were 1.09 and 0.34 femtomoles on column for alpha-tomatine and tomatidine, respectively. This  
424 corresponds to 0.8 and 0.25  $\mu\text{g}/100\text{g}$  of alpha-tomatine and tomatidine in tomato, respectively,  
425 given our extraction procedures. Relative quantification for tSGAs and aglycones that did not have  
426 commercially available standards was performed using alpha-tomatine and tomatidine,

427 respectively. Our methods were able to successfully profile tSGAs in a comprehensive array of  
428 commonly available tomato-based products. These values are among the first to be reported in the  
429 literature and can serve as benchmarks for future studies investigating tSGAs in a variety of  
430 contexts. Our extraction and UHPLC-MS/MS method will allow researchers to rapidly and  
431 accurately generate data about tSGAs and overcomes a major limitation hampering this field and  
432 allow for the field to advance.

433

#### 434 **Conflict of Interest**

435 The authors declare that the research was conducted in the absence of any commercial or  
436 financial relationships that could be construed as a potential conflict of interest.

437

#### 438 **Funding**

439 Financial support was provided by the USDA-NIFA National Needs Fellowship (2014-38420-  
440 21844), USDA Hatch (OHO01470), Foods for Health, a focus area of the Discovery Themes  
441 Initiative at The Ohio State University, and the Ohio Agricultural Research and Development  
442 Center.

443

#### 444 **Acknowledgements**

445 We thank David Francis, Jiheun Cho, Troy Aldrich (The Ohio State University, Ohio Agriculture  
446 Research and Development Center), and the North Central Agricultural Research Station crews  
447 for assistance with selecting, planting, and harvesting tomatoes used in this study.

448

#### 449 **Data Availability Statement**

450 The raw data supporting the conclusions of this manuscript will be made available by the  
451 authors, without undue reservation, to any qualified researchers.

452

453 **Works Cited:**

- 454 Alseikh, S., Tohge, T., Wendenberg, R., Scossa, F., Omranian, N., Li, J., Kleessen, S.,  
455 Giavalisco, P., Pleban, T., Mueller-Roeber, B., Zamir, D., Nikoloski, Z., Fernie, A.R., 2015.  
456 Identification and mode of inheritance of quantitative trait loci for secondary metabolite  
457 abundance in tomato. *Plant Cell* 27, 485–512. doi:10.1105/tpc.114.132266
- 458 Baldina, S., Picarella, M.E., Troise, A.D., Pucci, A., Ruggieri, V., Ferracane, R., Barone, A.,  
459 Fogliano, V., Mazzucato, A., 2016. Metabolite Profiling of Italian Tomato Landraces with  
460 Different Fruit Types. *Front. Plant Sci.* 7, 664. doi:10.3389/fpls.2016.00664
- 461 Ballester, A.-R., Tikunov, Y., Molthoff, J., Grandillo, S., Viquez-Zamora, M., de Vos, R., de  
462 Maagd, R.A., van Heusden, S., Bovy, A.G., 2016. Identification of Loci Affecting  
463 Accumulation of Secondary Metabolites in Tomato Fruit of a *Solanum lycopersicum* ×  
464 *Solanum chmielewskii* Introgression Line Population. *Front. Plant Sci.* 7, 1428.  
465 doi:10.3389/fpls.2016.01428
- 466 Caprioli, G., Cahill, M.G., James, K.J., 2014. Mass Fragmentation Studies of  $\alpha$ -Tomatine and  
467 Validation of a Liquid Chromatography LTQ Orbitrap Mass Spectrometry Method for Its  
468 Quantification in Tomatoes. *Food Anal. Methods* 7, 1565–1571. doi:10.1007/s12161-013-  
469 9771-9
- 470 Cárdenas, P.D., Sonawane, P.D., Heinig, U., Bocobza, S.E., Burdman, S., Aharoni, A., 2015.  
471 The bitter side of the nightshades: Genomics drives discovery in Solanaceae steroidal  
472 alkaloid metabolism. *Phytochemistry* 113, 24–32. doi:10.1016/j.phytochem.2014.12.010
- 473 Cárdenas, P.D., Sonawane, P.D., Pollier, J., Vanden Bossche, R., Dewangan, V., Weithorn, E.,  
474 Tal, L., Meir, S., Rogachev, I., Malitsky, S., Giri, A.P., Goossens, A., Burdman, S.,  
475 Aharoni, A., 2016. GAME9 regulates the biosynthesis of steroidal alkaloids and upstream  
476 isoprenoids in the plant mevalonate pathway. *Nat. Commun.* 7, 10654.  
477 doi:10.1038/ncomms10654
- 478 Cayen, M.N., 1971. Effect of dietary tomatine on cholesterol metabolism in the rat. *J. Lipid Res.*  
479 12, 482–490.
- 480 Choi, S.H., Ahn, J.-B., Kozukue, N., Kim, H.-J., Nishitani, Y., Zhang, L., Mizuno, M., Levin,  
481 C.E., Friedman, M., 2012. Structure–Activity Relationships of  $\alpha$ -,  $\beta$  1 -,  $\gamma$ -, and  $\delta$ -Tomatine  
482 and Tomatidine against Human Breast (MDA-MB-231), Gastric (KATO-III), and Prostate  
483 (PC3) Cancer Cells. *J. Agric. Food Chem.* 60, 3891–3899. doi:10.1021/jf3003027
- 484 Chungcharoen, A., 1988. Glycoalkaloid content of potatoes grown under controlled  
485 environments and stability of glycoalkaloids during processing. PhD Thesis. University of  
486 Wisconsin, Madison, WI.
- 487 Cichon, M.J., Riedl, K.M., Wan, L., Thomas-Ahner, J.M., Francis, D.M., Clinton, S.K.,  
488 Schwartz, S.J., 2017. Plasma Metabolomics Reveals Steroidal Alkaloids as Novel  
489 Biomarkers of Tomato Intake in Mice. *Mol. Nutr. Food Res.* 61, 1700241.  
490 doi:10.1002/mnfr.201700241
- 491 Cooperstone, J.L., 2020. Lycopene, in: Wildman, E.C., Bruno, R.S. (Eds.), *Handbook of*  
492 *Nutraceuticals and Functional Foods*. CRC Press, pp. 37–53. doi:10.1201/9780429195594-3

- 493 Cooperstone, J.L., Tober, K.L., Riedl, K.M., Teegarden, M.D., Cichon, M.J., Francis, D.M.,  
494 Schwartz, S.J., Oberyshyn, T.M., 2017. Tomatoes protect against development of UV-  
495 induced keratinocyte carcinoma via metabolomic alterations. *Sci. Rep.* 7, 5106.  
496 doi:10.1038/s41598-017-05568-7
- 497 Del Giudice, R., Raiola, A., Tenore, G.C., Frusciante, L., Barone, A., Monti, D.M., Rigano,  
498 M.M., 2015. Antioxidant bioactive compounds in tomato fruits at different ripening stages  
499 and their effects on normal and cancer cells. *J. Funct. Foods* 18, 83–94.  
500 doi:10.1016/J.JFF.2015.06.060
- 501 Dzakovich, M.P., Gas-Pascual, E., Orchard, C.J., Sari, E.N., Riedl, K.M., Schwartz, S.J., Francis,  
502 D.M., Cooperstone, J.L., 2019. Analysis of Tomato Carotenoids: Comparing Extraction and  
503 Chromatographic Methods. *J. AOAC Int.* 102, 1069–1079. doi:10.5740/jaoacint.19-0017
- 504 Eltayeb, E.A., Roddick, J.G., 1984. Changes in the Alkaloid Content of Developing Fruits of  
505 Tomato (*Lycopersicon esculentum* Mill.) II. *J. Exp. Bot.* 35, 261–267.  
506 doi:10.1093/jxb/35.2.261
- 507 Etalo, D.W., De Vos, R.C.H., Joosten, M.H.A.J., Hall, R.D., 2015. Spatially resolved plant  
508 metabolomics: Some potentials and limitations of laser-ablation electrospray ionization  
509 mass spectrometry metabolite imaging. *Plant Physiol.* 169, 1424–1435.  
510 doi:10.1104/pp.15.01176
- 511 Fontaine, T.D., Irving, G.W., Ma, R., Poole, J.B., Doolittle, S.P., 1948. Isolation and partial  
512 characterization of crystalline tomatine, an antibiotic agent from the tomato plant. *Arch.*  
513 *Biochem.* 18, 467–75.
- 514 Friedman, M., 2002. Tomato glycoalkaloids: role in the plant and in the diet. *J. Agric. Food*  
515 *Chem.* 50, 5751–5780.
- 516 Friedman, M., Levin, C.E., 1998. Dehydrotomatine content in tomatoes. *J. Agric. Food Chem.*  
517 46, 4571–4576. doi:10.1021/jf9804589
- 518 Friedman, M., Levin, C.E., 1992. Reversed-phase high-performance liquid chromatographic  
519 separation of potato glycoalkaloids and hydrolysis products on acidic columns. *J. Agric.*  
520 *Food Chem.* 40, 2157–2163. doi:10.1021/jf00023a023
- 521 Fujiwara, Y., Takaki, A., Uehara, Y., Ikeda, T., Okawa, M., Yamauchi, K., Ono, M., Yoshimitsu,  
522 H., Nohara, T., 2004. Tomato steroidal alkaloid glycosides, esculeosides A and B, from ripe  
523 fruits. *Tetrahedron* 60, 4915–4920. doi:10.1016/j.tet.2004.03.088
- 524 Hövelmann, Y., Jagels, A., Schmid, R., Hübner, F., Humpf, H.-U., 2019. Identification of  
525 potential human urinary biomarkers for tomato juice intake by mass spectrometry-based  
526 metabolomics. *Eur. J. Nutr.* 1–13. doi:10.1007/s00394-019-01935-4
- 527 Iijima, Y., Fujiwara, Y., Tokita, T., Ikeda, T., Nohara, T., Aoki, K., Shibata, D., 2009.  
528 Involvement of Ethylene in the Accumulation of Esculeoside A during Fruit Ripening of  
529 Tomato (*Solanum lycopersicum*). *J. Agric. Food Chem.* 57, 3247–3252.  
530 doi:10.1021/jf8037902
- 531 Iijima, Y., Nakamura, Y., Ogata, Y., Tanaka, K.K., Sakurai, N., Suda, K., Suzuki, T., Suzuki, H.,  
532 Okazaki, K., Kitayama, M., Kanaya, S., Aoki, K., Shibata, D., 2008. Metabolite annotations



- 533 based on the integration of mass spectral information. *Plant J.* 54, 949–62.  
534 doi:10.1111/j.1365-313X.2008.03434.x
- 535 Iijima, Y., Watanabe, B., Sasaki, R., Takenaka, M., Ono, H., Sakurai, N., Umemoto, N., Suzuki,  
536 H., Shibata, D., Aoki, K., 2013. Steroidal glycoalkaloid profiling and structures of  
537 glycoalkaloids in wild tomato fruit. *Phytochemistry* 95, 145–157.  
538 doi:10.1016/J.PHYTOCHEM.2013.07.016
- 539 Irving, G.W., Fontaine, T.D., Doolittle, S.P., 1945. Lycopersicin, a Fungistatic Agent from the  
540 Tomato Plant. *Science* (80- ). 102, 9–11.
- 541 Itkin, M., Heinig, U., Tzfadia, O., Bhide, A.J., Shinde, B., Cardenas, P.D., Bocobza, S.E., Unger,  
542 T., Malitsky, S., Finkers, R., Tikunov, Y., Bovy, A., Chikate, Y., Singh, P., Rogachev, I.,  
543 Beekwilder, J., Giri, A.P., Aharoni, A., 2013. Biosynthesis of antinutritional alkaloids in  
544 solanaceous crops is mediated by clustered genes. *Science* 341, 175–9.  
545 doi:10.1126/science.1240230
- 546 Itkin, M., Rogachev, I., Alkan, N., Rosenberg, T., Malitsky, S., Masini, L., Meir, S., Iijima, Y.,  
547 Aoki, K., de Vos, R., Prusky, D., Burdman, S., Beekwilder, J., Aharoni, A., 2011.  
548 GLYCOALKALOID METABOLISM1 Is Required for Steroidal Alkaloid Glycosylation  
549 and Prevention of Phytotoxicity in Tomato. *Plant Cell* 23, 4507–4525.  
550 doi:10.1105/tpc.111.088732
- 551 Keukens, E.A.J., Hop, M.E.C.M., Jongen+, W.M.F., 1994. Rapid High-Performance Liquid  
552 Chromatographic Method for the Quantification of-Tomatine in Tomato, *Food Chem.*
- 553 Kopec, R.E., Cooperstone, J.L., Cichon, M.J., Schwartz, S.J., 2012. Analysis Methods of  
554 Carotenoids, in: *Analysis of Antioxidant-Rich Phytochemicals*. Wiley-Blackwell, Oxford,  
555 UK, pp. 105–148. doi:10.1002/9781118229378.ch4
- 556 Kozukue, N., Friedman, M., 2003. Tomatine, chlorophyll, Beta-carotene and lycopene content in  
557 tomatoes during growth and maturation. *J. Sci. Food Agric.* 83, 195–200.  
558 doi:10.1002/jsfa.1292
- 559 Kozukue, N., Han, J.-S., Lee, K.-R., Friedman, M., 2004. Dehydrotomatine and  $\alpha$ -Tomatine  
560 Content in Tomato Fruits and Vegetative Plant Tissues. *J. Agric. Food Chem.* 52, 2079–  
561 2083. doi:10.1021/jf0306845
- 562 Lawson, D.R., Erb, W.A., Miller, A.R., 1992. Analysis of Solanum Alkaloids Using Internal  
563 Standardization and Capillary Gas Chromatography. *Food Chem* 40, 2186–2191.
- 564 Lee, K.-R., Kozukue, N., Han, J.-S., Park, J.-H., Chang, E., Baek, E.-J., Chang, J.-S., Friedman,  
565 M., 2004. Glycoalkaloids and Metabolites Inhibit the Growth of Human Colon (HT29) and  
566 Liver (HepG2) Cancer Cells. *J. Agric. Food Chem.* 52, 2832–2839. doi:10.1021/jf030526d
- 567 Manabe, H., Fujiwara, Y., Ikeda, T., Ono, M., Murakami, K., Zhou, J.R., Yokomizo, K., Nohara,  
568 T., 2013. Saponins esculeosides B-1 and B-2 in Italian canned tomatoes. *Chem. Pharm.*  
569 *Bull.* 61, 764–767. doi:10.1248/cpb.c13-00202
- 570 Mintz-Oron, S., Mandel, T., Rogachev, I., Feldberg, L., Lotan, O., Yativ, M., Wang, Z., Jetter,  
571 R., Venger, I., Adato, A., Aharoni, A., 2008. Gene Expression and Metabolism in Tomato  
572 Fruit Surface Tissues. *PLANT Physiol.* 147, 823–851. doi:10.1104/pp.108.116004

- 573 Moco, S., Bino, R.J., Vorst, O., Verhoeven, H.A., de Groot, J., van Beek, T.A., Vervoort, J., de  
574 Vos, C.H.R.H.R., 2006. A liquid chromatography-mass spectrometry-based metabolome  
575 database for tomato. *Plant Physiol.* 141, 1205–18. doi:10.1104/pp.106.078428
- 576 Nohara, T., Fujiwara, Y., Zhou, J.R., Urata, J., Ikeda, T., Murakami, K., El-Aasr, M., Ono, M.,  
577 2015. Saponins, esculeosides B-1 and B-2, in tomato juice and sapogenol, esculeogenin B 1.  
578 *Chem. Pharm. Bull.* 63, 848–850. doi:10.1248/cpb.c15-00449
- 579 Ökmen, B., Etalo, D.W., Joosten, M.H.A.J., Bouwmeester, H.J., de Vos, R.C.H., Collemare, J.,  
580 De Wit, P.J.G.M., 2013. Detoxification of  $\alpha$ -tomatine by *Cladosporium fulvum* is required  
581 for full virulence on tomato. *New Phytol.* 198, 1203–1214. doi:10.1111/nph.12208
- 582 Ono, H., Kozuka, D., Chiba, Y., Horigane, A., Isshiki, K., 1997. Structure and Cytotoxicity of  
583 Dehydrotomatine, a Minor Component of Tomato Glycoalkaloids. *J. Agric. Food Chem.*  
584 doi:10.1021/jf970253k
- 585 Rick, C.M., Uhlig, J.W., Jones, D., 1994. High alpha-tomatine content in ripe fruit of Andean  
586 *Lycopersicon esculentum* var. *cerasiforme*: developmental and genetic aspects. *Proc. Natl.*  
587 *Acad. Sci.* 91, 12877–81.
- 588 Rodriguez-Saona, L.E., Wrolstad, R.E., Pereira, C., 1999. Glycoalkaloid Content and  
589 Anthocyanin Stability to Alkaline Treatment of Red-Fleshed Potato Extracts. *J. Food Sci.*  
590 64, 445–450. doi:10.1111/j.1365-2621.1999.tb15060.x
- 591 Schlösser, E., Gottlieb, D., 1966. Mode of hemolytic action of the antifungal polyene antibiotic  
592 filipin. *Zeitschrift fur Naturforsch. - Sect. B J. Chem. Sci.* 21, 74–77. doi:10.1515/znB-  
593 1966-0120
- 594 Sonawane, P.D., Heinig, U., Panda, S., Gilboa, N.S., Yona, M., Pradeep Kumar, S., Alkan, N.,  
595 Unger, T., Bocobza, S., Pliner, M., Malitsky, S., Tkachev, M., Meir, S., Rogachev, I.,  
596 Aharoni, A., 2018. Short-chain dehydrogenase/reductase governs steroidal specialized  
597 metabolites structural diversity and toxicity in the genus *Solanum*. *Proc. Natl. Acad. Sci. U.*  
598 *S. A.* doi:10.1073/pnas.1804835115
- 599 Tajner-Czopek, A., Rytel, E., Aniołowska, M., Hamouz, K., 2014. The influence of French fries  
600 processing on the glycoalkaloid content in coloured-fleshed potatoes. *Eur. Food Res.*  
601 *Technol.* 238, 895–904. doi:10.1007/s00217-014-2163-6
- 602 Tomas, M., Beekwilder, J., Hall, R.D., Sagdic, O., Boyacioglu, D., Capanoglu, E., 2017.  
603 Industrial processing versus home processing of tomato sauce: Effects on phenolics,  
604 flavonoids and in vitro bioaccessibility of antioxidants. *Food Chem.*  
605 doi:10.1016/j.foodchem.2016.09.201
- 606 Zhu, G., Wang, S., Huang, Z., Zhang, S., Liao, Q., Zhang, C., Lin, T., Qin, M., Peng, M., Yang,  
607 C., Cao, X., Han, X., Wang, X., van der Knaap, E., Zhang, Z., Cui, X., Klee, H., Fernie,  
608 A.R., Luo, J., Huang, S., 2018. Rewiring of the Fruit Metabolome in Tomato Breeding. *Cell*  
609 172, 249-261.e12. doi:10.1016/j.cell.2017.12.019
- 610
- 611

612 **Figure Captions**

613

614 **Fig. 1. Structural and isomeric variation in selected tomato steroidal alkaloids.** Steroidal  
615 glycoalkaloids found in tomato (tSGAs) are spirosolane-type saponins with variations in a singular  
616 double-bond (C5:6), F-ring decorations (C22-C27), F-ring rearrangement (resulting in a change in  
617 stereochemistry at C22), and C3 glycosylation (typically a four-sugar tetrasaccharide,  
618 lycotetraose). The undecorated SA backbone is shown first with relevant carbons numbered and  
619 ring names (A-F). Steroidal alkaloids (SAs) were grouped based on structural similarity with bonds  
620 of varying stereochemistry denoted by wavy bonds and varying C5:6 saturation status denoted by  
621 a dashed bond. Structural variation, along with the monoisotopic mass, molecular formula, and  
622 common name are displayed alongside structures for each group. R-groups were used to denote  
623 status of C3 glycosylation in all groups (R<sub>1</sub> and R<sub>2</sub>) and possible positions of glucosylation on  
624 glucosylated (dehydro)acetoxytomatine (R<sub>3</sub>, R<sub>4</sub>). All possible isomers and derivatives are not  
625 shown, just those quantitated in this method.

626

627 **Fig. 2. Chromatogram of tSGAs found in red ripe tomatoes measured by our UHPLC-MS/MS**  
628 **method. Peaks are identified as follows: 1a-c: Esculeoside B1-3; 2a-d: Hydroxytomatine; 3:**  
629 **Dehydrolycoperoside F, G, or Dehydroesculeoside A; 4a,b: Lycoperoside F, G, or Esculeoside A;**  
630 **5a-c: Acetoxytomatine; 6a,b: Dehydrotomatine; 7: Alpha-tomatine; 8: Alpha-solanine; 9:**  
631 **Solanidine; 10: Tomatidine; 11: Tomatidenol**

632

633

634 Table 1. LC-MS/MS MRM parameters of steroidal glycoalkaloids quantified by our method.

| Analyte                                           | Retention Time (min)   | Parent Mass [M+H] <sub>a</sub> | Product Ions   | Cone Voltage (V) | Collision Energy (eV) |
|---------------------------------------------------|------------------------|--------------------------------|----------------|------------------|-----------------------|
| Esculeoside B                                     | 2.55, 2.67, 2.74       | 1228.6                         | 254.9*, 1048.8 | 75               | 65, 40                |
| Hydroxytomatine                                   | 3.02, 3.28, 3.37, 3.57 | 1050.6                         | 254.9, 1032.7  | 55               | 55, 30                |
| Dehydrolycoperoside F, G, or Dehydroesculeoside A | 3.08                   | 1268.6                         | 252.9*, 1208.9 | 80               | 65, 35                |
| Lycoperoside F, G, or Esculeoside A               | 3.11, 3.26             | 1270.6                         | 1048.8, 1210.9 | 70               | 60, 30                |
| Acetoxytomatine <sub>b</sub> (I)                  | 4.28                   | 1092.6                         | 84.7, 1032.7   | 40               | 65, 35                |
| Dehydrotomatine <sub>c</sub>                      | 5.09, 5.49             | 1032.5                         | 84.7, 252.9*   | 70               | 80, 50                |
| Acetoxytomatine (II)                              | 5.42, 5.66             | 1092.6                         | 144.7, 162.8   | 40               | 50, 45                |
| Alpha-tomatine <sub>c</sub>                       | 5.45                   | 1034.6                         | 84.7*, 160.8   | 70               | 85, 60                |
| Alpha-solanine <sub>c,d</sub>                     | 5.64                   | 869.1                          | 97.8*, 399.1   | 70               | 85, 65                |
| Solanidine <sub>c,d</sub>                         | 7.22                   | 398.7                          | 80.7, 97.8*    | 70               | 55, 35                |
| Tomatidine <sub>c</sub>                           | 7.30                   | 416.4                          | 160.8, 254.9   | 50               | 30, 30                |
| Tomatidenol <sub>c</sub>                          | 7.36                   | 414.3                          | 125.8, 270.7   | 40               | 30, 20                |

635 <sub>a</sub>Analytes were quantified using the following settings: Mass span: 0.3 Da, Capillary voltage: 0.5

636 kV, extractor voltage: 5 V, RF Lens voltage: 0.5 V, source temperature: 150°C, desolvation

637 temperature: 500°C, desolvation flow rate: 1000 L/hr, cone gas flow rate: 50 L/hr.

638 <sub>b</sub>Commonly referred to as lycoperosides A, B, or C

639 <sub>c</sub>Indicates that analyte was confirmed by authentic standard

640 <sub>d</sub>Indicates analyte used as an internal standard.

- 641 \*Indicates quantifying ion; other ions used for qualifying purposes. Compounds with no  
642 indicated quantifying ion were quantified using the sum of both MRM transitions.



643 Table 2. UHPLC-QTOF-MS Confirmation of tSGA Identities

| Tentative Identification                          | Molecular Formula                                | Retention Time (min) | Monoisotopic Mass | Observed Mass [M+H] | Mass Error ( $\Delta$ ppm) | Common MS/MS Fragments <sup>a</sup>                            |
|---------------------------------------------------|--------------------------------------------------|----------------------|-------------------|---------------------|----------------------------|----------------------------------------------------------------|
| Esculeoside B                                     | C <sub>56</sub> H <sub>93</sub> NO <sub>28</sub> | 2.24                 | 1227.5884         | 1228.5989           | 2.20                       | 1048.5380, 273.2120, 255.2016,<br>163.0509, 145.0404, 85.0205  |
|                                                   |                                                  | 2.34                 |                   | 1228.5967           | 0.41                       |                                                                |
|                                                   |                                                  | 2.45                 |                   | 1228.5966           | 0.33                       |                                                                |
| Hydroxytomatine                                   | C <sub>50</sub> H <sub>83</sub> NO <sub>22</sub> | 2.84                 | 1049.5407         | 1050.5500           | 1.43                       | 1032.5385, 273.2213, 255.2203,<br>161.1318, 145.0489, 85.0279  |
|                                                   |                                                  | 3.22                 |                   | 1050.5513           | 2.67                       |                                                                |
|                                                   |                                                  | 3.29                 |                   | 1050.5506           | 2.00                       |                                                                |
|                                                   |                                                  | 3.50                 |                   | 1050.5501           | 1.52                       |                                                                |
| Dehydrolycoperoside F, G, or Dehydroesculeoside A | C <sub>58</sub> H <sub>93</sub> NO <sub>29</sub> | 2.41                 | 1267.5828         | 1268.5930           | 1.89                       | 1208.5714, 1046.5175, 271.2054,<br>253.1951, 163.0600, 85.0284 |
| Lycoperoside F, G, or Esculeoside A               | C <sub>58</sub> H <sub>95</sub> NO <sub>29</sub> | 2.44                 | 1269.5985         | 1270.6076           | 1.02                       | 1210.5900, 1048.5324, 273.2213,<br>255.2108, 163.0600, 85.0285 |
|                                                   |                                                  | 3.06                 |                   | 1270.6095           | 2.52                       |                                                                |
| Acetoxytomatine (I)                               | C <sub>52</sub> H <sub>85</sub> NO <sub>23</sub> | 4.22                 | 1091.5507         | 1092.5614           | 2.65                       | 1032.5386, 273.2216, 255.2112,<br>161.1326, 145.0497, 85.0287  |
| Dehydrotomatine <sup>b</sup>                      | C <sub>50</sub> H <sub>81</sub> NO <sub>21</sub> | 4.99                 | 1031.5301         | 1032.5388           | 0.87                       | 1014.5274, 271.2054, 253.1951,<br>145.0495, 85.0284, 57.0337   |
|                                                   |                                                  | 5.20                 |                   | 1032.5373           | 0.58                       |                                                                |
| Acetoxytomatine (II)                              | C <sub>52</sub> H <sub>85</sub> NO <sub>23</sub> | 5.32                 | 1091.5507         | 1092.5619           | 3.11                       | 1032.5404, 273.2216, 255.2114,<br>161.1328, 145.0499, 85.0288  |
|                                                   |                                                  | 5.39                 |                   | 1092.5608           | 2.11                       |                                                                |
| Alpha-tomatine <sup>b</sup>                       | C <sub>50</sub> H <sub>83</sub> NO <sub>21</sub> | 5.35                 | 1033.5457         | 1034.5557           | 2.13                       | 1016.5449, 416.3523, 273.2217,<br>255.2112, 145.0498, 85.0287  |
| Tomatidine <sup>b</sup>                           | C <sub>27</sub> H <sub>45</sub> NO <sub>2</sub>  | 6.95                 | 415.3450          | 416.3531            | 0.72                       | 398.3414, 273.2208, 255.2101,<br>161.1318, 126.1271, 81.0693   |

|                          |                                                 |      |          |          |      |                                                              |
|--------------------------|-------------------------------------------------|------|----------|----------|------|--------------------------------------------------------------|
| Tomatidenol <sup>b</sup> | C <sub>27</sub> H <sub>43</sub> NO <sub>2</sub> | 6.98 | 413.3294 | 414.3371 | 0.24 | 396.3260, 271.2053, 253.1949,<br>161.1322, 126.1275, 81.0695 |
|--------------------------|-------------------------------------------------|------|----------|----------|------|--------------------------------------------------------------|

---

644 <sup>a</sup>MS/MS product ions generated at 70 eV and 45 eV for glycosylated and aglycone species, respectively. Other source parameters

645 were previously enumerated.

646 <sup>b</sup>Identification confirmed by authentic standard

647

648 Table 3. Extraction efficiency of commercially available tSGAs and potato-derived internal  
649 standards.

| Analyte                     | Sample Size | Extraction Efficiency (%) | LOD (femtomoles injected) | LOQ (femtomoles injected) |
|-----------------------------|-------------|---------------------------|---------------------------|---------------------------|
| Alpha-tomatine              | n=6         | 100.8 ± 13.1              | 1.0988                    | 0.3296                    |
| Alpha-solanine <sup>a</sup> | n=6         | 94.3 ± 3.4                | N/A <sup>b</sup>          | N/A                       |
| Tomatidine                  | n=6         | 93.0 ± 6.8                | 0.3354                    | 0.1006                    |
| Solanidine <sup>a</sup>     | n=6         | 99.7 ± 7.1                | N/A                       | N/A                       |

650 <sup>a</sup>Analyte used as an internal standard with no calibration curve

651 <sup>b</sup>Not applicable due to its use as an internal standard

652

653

654

655

656

657

658

659

660

661

662

663

664

665

666 Table 4. Intraday and interday coefficient of variation values for analytes quantified by our  
667 UHPLC-MS/MS method

| Analyte                                           | Intraday Coefficient of Variation (%) <sup>a</sup> | Interday Coefficient of Variation (%) <sup>b</sup> |
|---------------------------------------------------|----------------------------------------------------|----------------------------------------------------|
| Esculeoside B                                     | 4.46                                               | 6.84                                               |
| Hydroxytomatine                                   | 4.00                                               | 5.60                                               |
| Dehydrolycoperoside F, G, or Dehydroesculeoside A | 8.42                                               | 8.03                                               |
| Lycoperoside F, G, or Esculeoside A               | 3.35                                               | 4.21                                               |
| Acetoxytomatine (I)                               | 3.56                                               | 3.89                                               |
| Dehydrotomatine                                   | 4.25                                               | 7.11                                               |
| Acetoxytomatine (II)                              | 7.57                                               | 7.70                                               |
| Alpha-tomatine                                    | 3.92                                               | 6.42                                               |
| Tomatidine                                        | 11.78                                              | 13.73                                              |
| Tomatidenol                                       | 11.69                                              | 13.61                                              |

668 <sup>a</sup>Average coefficient of variation within a day of six samples extracted and run by a single  
669 operator. The experiment was repeated over three days.

670 <sup>b</sup>Average coefficient of variation over a three-day period of 18 samples extracted and run by a  
671 single operator.

672 Table 5. Survey of tSGAs in common tomato-based products reported in µg per serving size

| Analyte                                                 | Fresh market<br>(n = 7) | Juice<br>(n = 3)  | Ketchup<br>(n = 3) | Pasta sauce<br>(n = 3) | Paste<br>(n = 3) | Pizza sauce<br>(n = 3) | Soup<br>(n = 3) | Whole peeled<br>(n = 3) |
|---------------------------------------------------------|-------------------------|-------------------|--------------------|------------------------|------------------|------------------------|-----------------|-------------------------|
| Serving size (g):                                       | 126                     | 228.5             | 17                 | 126                    | 33               | 62                     | 126             | 126                     |
| Esculeoside B                                           | 4.3±9.7 <sub>a</sub>    | 3.3±3.00          | 0.3±0.6            | 5.9±7.2                | 3.6±0.8          | 1.8±0.6                | 2.0±2.1         | 21.8±10.3               |
| Hydroxytomatine                                         | 297.9±248.1             | 54.3± 25.0        | 12.1±1.3           | 80.4±14.5              | 57.9±13.2        | 26.4±4.9               | 42.0±7.3        | 50.4±3.7                |
| Dehydrolycoperoside<br>F, G, or<br>Dehydroesculeoside A | 7.0±12.1                | N.D. <sub>b</sub> | N.D.               | N.D.                   | N.D.             | N.D.                   | N.D.            | N.D.                    |
| Lycoperoside F, G or<br>Esculeoside A                   | 1589.4±1738.3           | N.D.              | N.D.               | N.D.                   | N.D.             | N.D.                   | N.D.            | N.D.                    |
| Acetoxytomatine                                         | 30.6±31.6               | 17.4±8.6          | 3.1±2.0            | 20.3±15.8              | 25.0±4.1         | 9.4±3.0                | 10.0±4.8        | 1.8±3.2                 |
| Dehydrotomatine                                         | 4.1±3.0                 | 41.0±29.0         | 5.7±0.7            | 41.3±14.9              | 28.2±3.9         | 19.4±2.0               | 31.6±7.8        | 11.3±5.9                |
| Alpha-tomatine                                          | 64.5±56.0               | 1083.5±747.4      | 156.3±9.7          | 1109.9±390.8           | 889.5±119.4      | 524.7±85.5             | 964.3±62.5      | 338.4±156.5             |
| Tomatidine                                              | N.Q. <sub>c</sub>       | N.Q.              | 0.4±0.3            | 1.7±1.3                | 0.8±0.0          | 0.8±0.1                | 1.5±0.5         | 0.42±0.2                |
| Tomatidenol                                             | N.Q.                    | N.Q.              | N.Q.               | 0.2±0.1                | 0.1±0.0          | N.Q.                   | N.Q.            | N.Q.                    |
| Total                                                   | 3376.0±2886.3           | 1307.7±823.7      | 191.7±23.4         | 1541.9±410.3           | 1135.1±285.9     | 736.5±166.6            | 1126.3±34.4     | 1101.3±116.5            |

673 <sub>a</sub>Mean ± standard deviation674 <sub>b</sub>Not detected675 <sub>c</sub>Not quantified



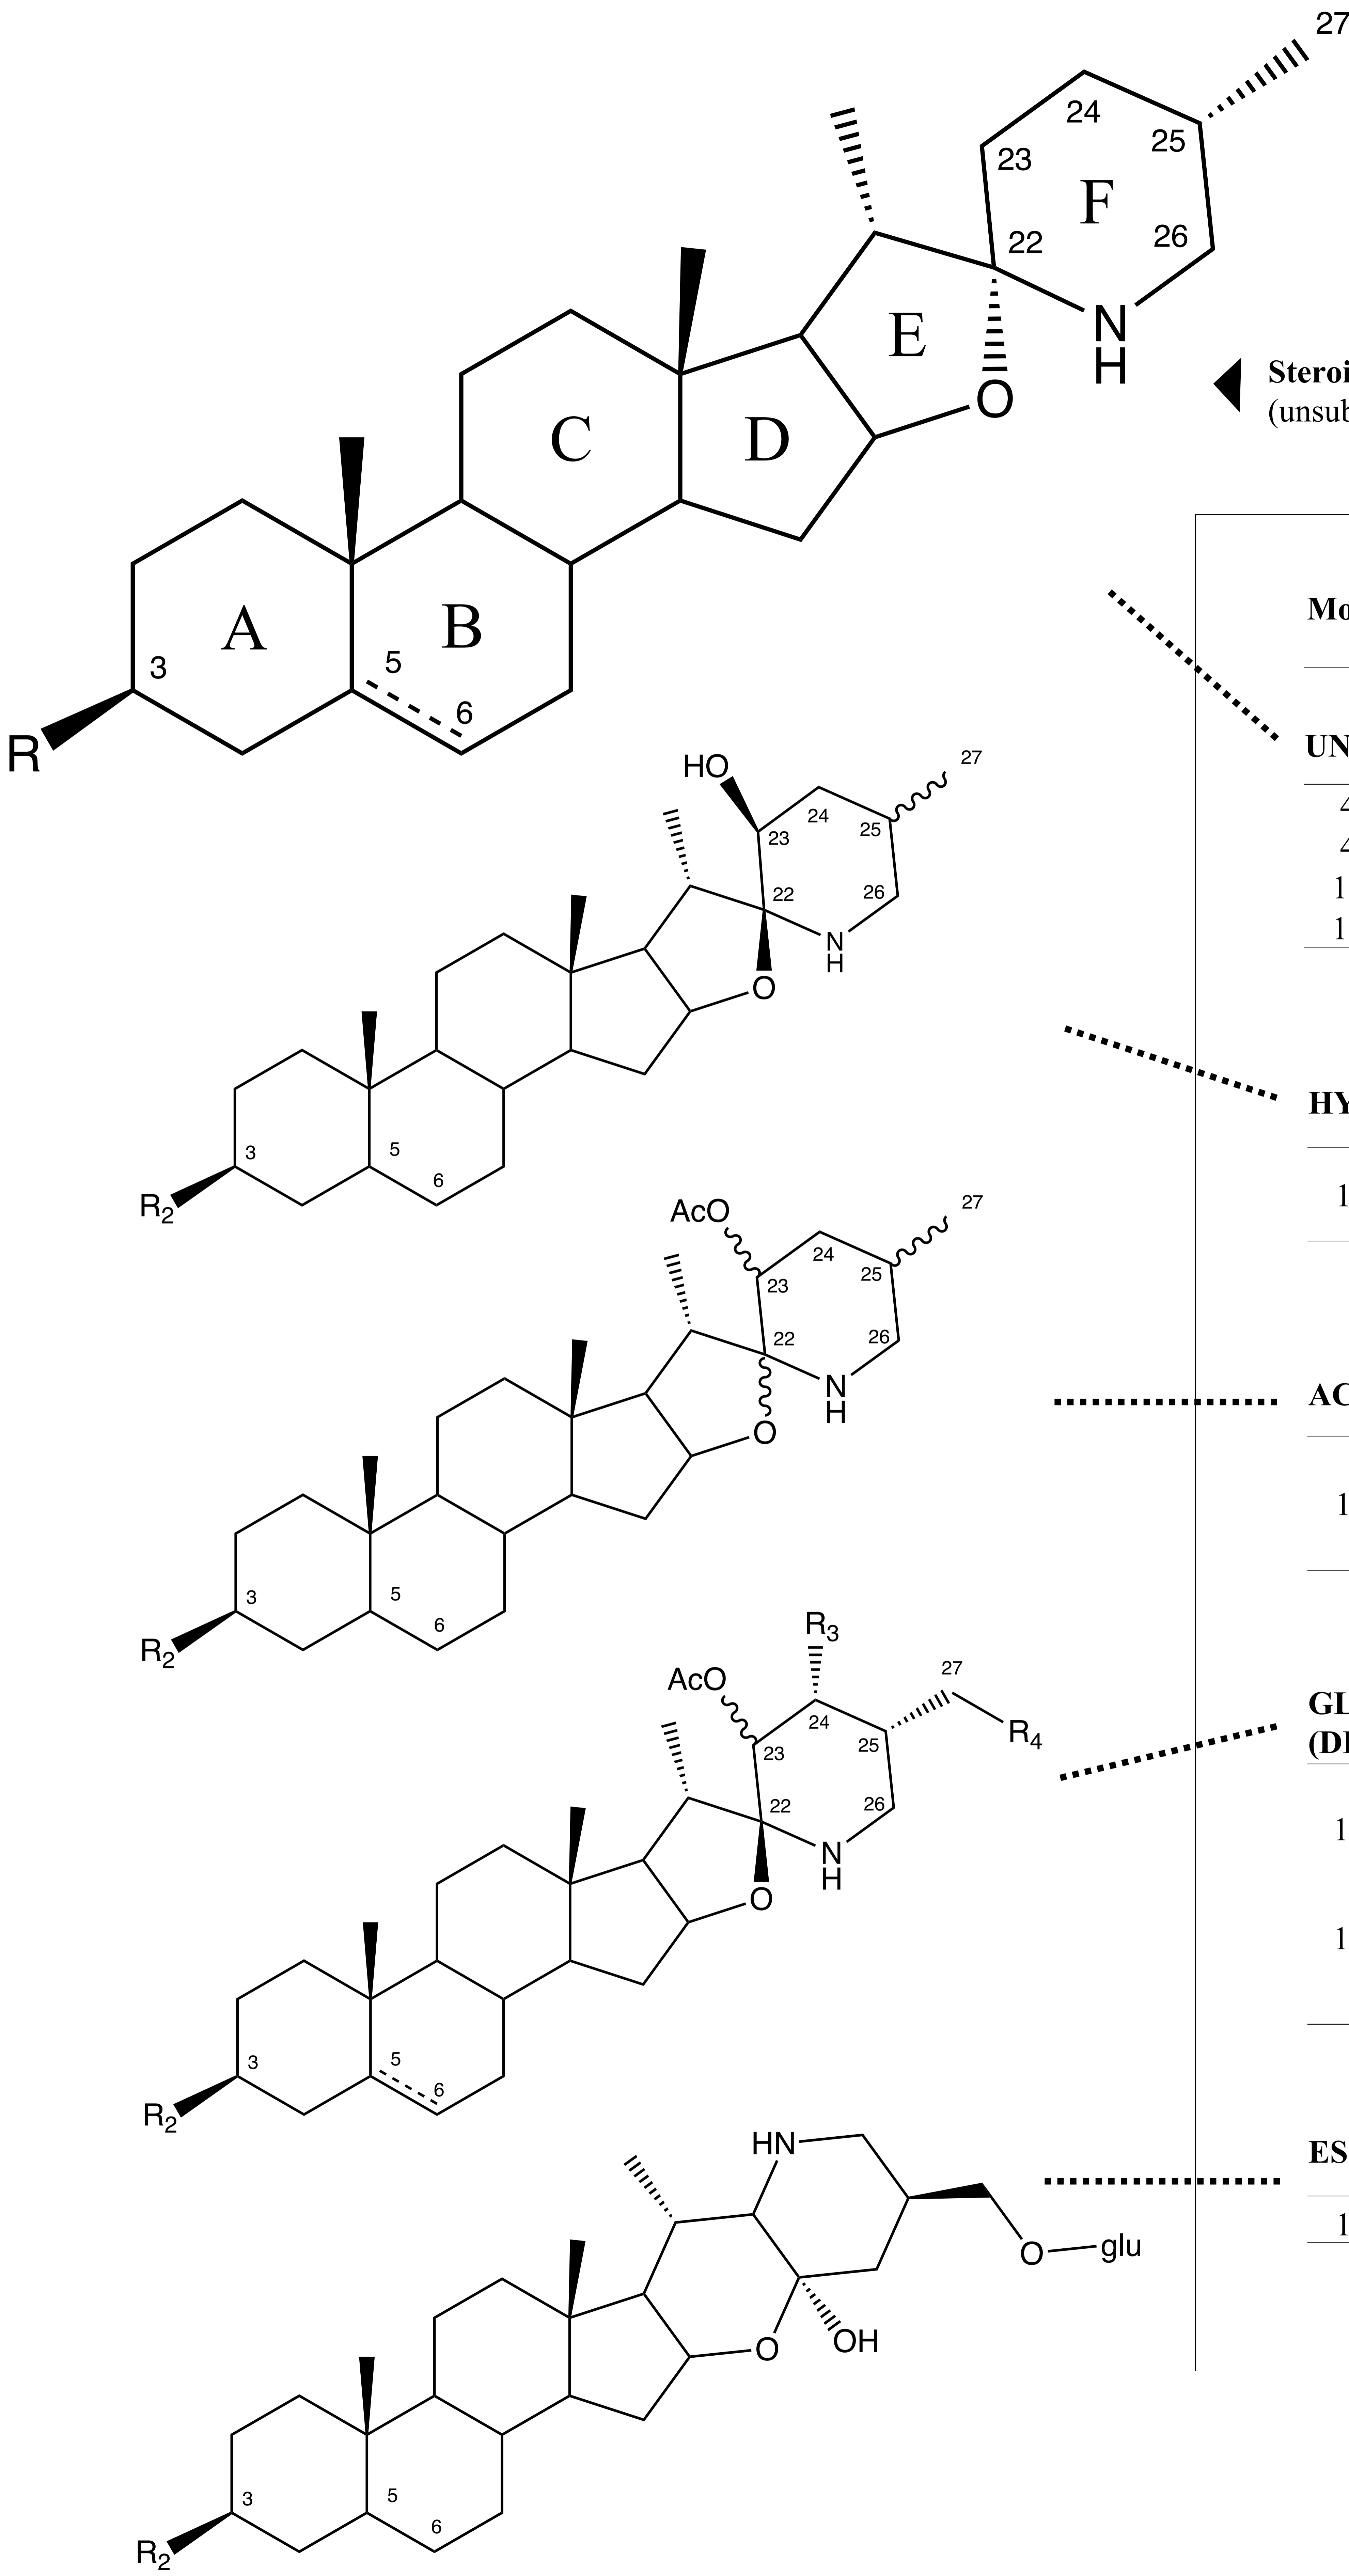

**R-GROUPS**

R : R<sub>1</sub> or R<sub>2</sub>  
 R<sub>1</sub> : hydroxyl  
 R<sub>2</sub> : lycotetraose  
 R<sub>3</sub> : H or O-glucose  
 R<sub>4</sub> : H or O-glucose

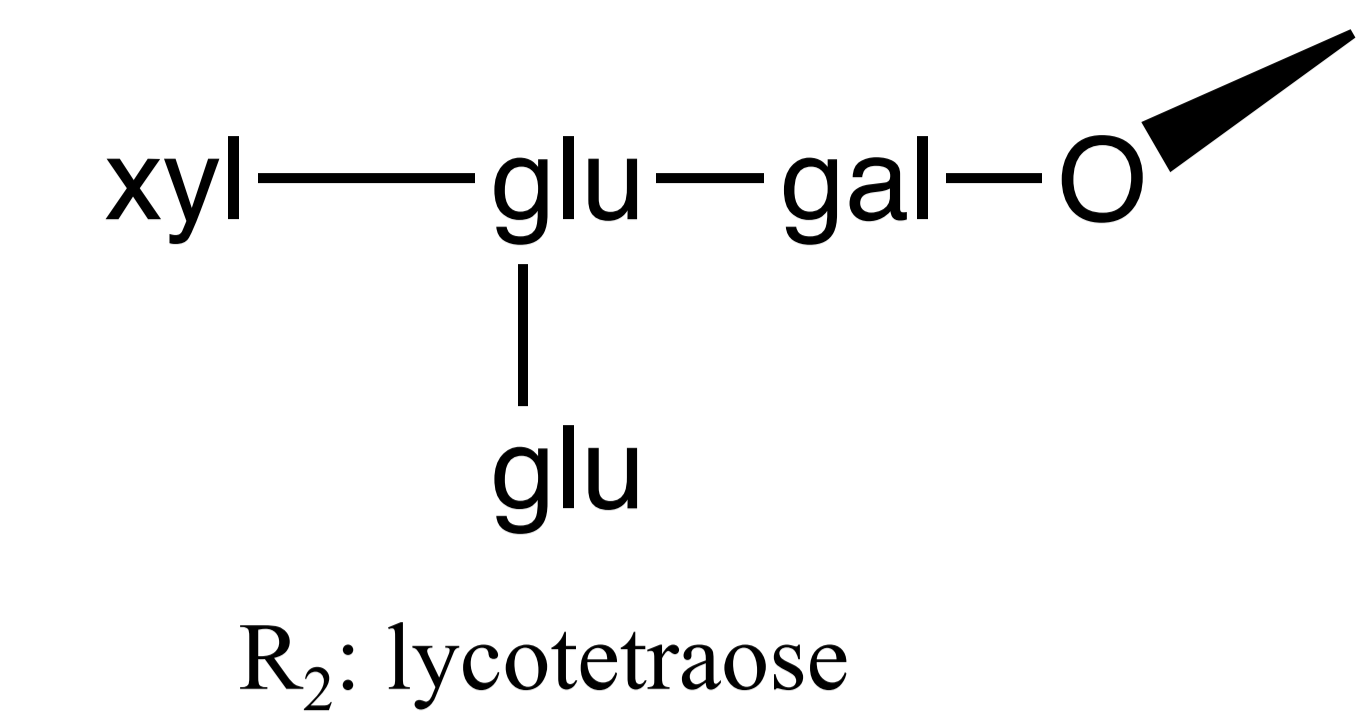

| Monoisotopic Mass                     | Molecular Formula                                | tSGA                  | Variations in Isomerization and Functional Groups |             |     |     |     |     |                      |            |            |
|---------------------------------------|--------------------------------------------------|-----------------------|---------------------------------------------------|-------------|-----|-----|-----|-----|----------------------|------------|------------|
| UNDECORATED F-RING                    |                                                  |                       | C3                                                | C5:6 alkene | C22 | C23 | C24 | C25 | F-ring Decoration    |            |            |
| 413.3294                              | C <sub>27</sub> H <sub>43</sub> NO <sub>2</sub>  | Tomatidenol           | R <sub>1</sub>                                    | Y           | S   | -   | -   | S   | -                    |            |            |
| 415.3450                              | C <sub>27</sub> H <sub>45</sub> NO <sub>2</sub>  | Tomatidine            | R <sub>1</sub>                                    | Y           | S   | -   | -   | S   | -                    |            |            |
| 1031.5301                             | C <sub>50</sub> H <sub>81</sub> NO <sub>21</sub> | Dehydrotomatine       | R <sub>2</sub>                                    | N           | S   | -   | -   | S   | -                    |            |            |
| 1033.5457                             | C <sub>50</sub> H <sub>83</sub> NO <sub>21</sub> | Alpha-tomatine        | R <sub>2</sub>                                    | N           | S   | -   | -   | S   | -                    |            |            |
| HYDROXYTOMATINE                       |                                                  |                       | C3                                                | C5:6 alkene | C22 | C23 | C24 | C25 | F-ring Decoration    |            |            |
| 1049.5407                             | C <sub>50</sub> H <sub>85</sub> NO <sub>22</sub> | Neorickioside A       | R <sub>2</sub>                                    | N           | S   | S   | -   | R   | OH (C23)             |            |            |
|                                       |                                                  | Neorickioside B       | R <sub>2</sub>                                    | N           | S   | S   | -   | S   | OH (C23)             |            |            |
| ACETOXYTOMATINE                       |                                                  |                       | C3                                                | C5:6 alkene | C22 | C23 | C24 | C25 | F-ring Decoration    |            |            |
| 1091.5507                             | C <sub>52</sub> H <sub>85</sub> NO <sub>23</sub> | Lycoperoside A        | R <sub>2</sub>                                    | N           | R   | R   | -   | S   | OAc (C23)            |            |            |
|                                       |                                                  | Lycoperoside B        | R <sub>2</sub>                                    | N           | S   | S   | -   | R   | OAc (C23)            |            |            |
|                                       |                                                  | Lycoperoside C        | R <sub>2</sub>                                    | N           | S   | S   | -   | S   | OAc (C23)            |            |            |
| GLUCOSYLATED (DEHYDRO)ACETOXYTOMATINE |                                                  |                       | C3                                                | C5:6 alkene | C22 | C23 | C24 | C25 | F-ring Decoration    |            |            |
| 1269.5985                             | C <sub>58</sub> H <sub>95</sub> NO <sub>29</sub> | Esculeoside A         | R <sub>2</sub>                                    | N           | S   | S   | -   | S   | OAc (C23)            | H (C24)    | Oglu (C27) |
|                                       |                                                  | Lycoperoside F        | R <sub>2</sub>                                    | N           | S   | R   | -   | S   | OAc (C23)            | H (C24)    | Oglu (C27) |
|                                       |                                                  | Lycoperoside G        | R <sub>2</sub>                                    | N           | S   | S   | R   | S   | OAc (C23)            | Oglu (C24) | H (C27)    |
| 1267.5828                             | C <sub>58</sub> H <sub>93</sub> NO <sub>29</sub> | Dehydroesculeoside A  | R <sub>2</sub>                                    | Y           | S   | S   | -   | S   | OAc (C23)            | H (C24)    | Oglu (C27) |
|                                       |                                                  | Dehydrolycoperoside F | R <sub>2</sub>                                    | Y           | S   | R   | -   | S   | OAc (C23)            | H (C24)    | Oglu (C27) |
|                                       |                                                  | Dehydrolycoperoside G | R <sub>2</sub>                                    | Y           | S   | S   | R   | S   | OAc (C23)            | Oglu (C24) | H (C27)    |
| ESCUELOSDIE B                         |                                                  |                       | C3                                                | C5:6 alkene | C22 | C23 | C24 | C25 | F-ring Decoration    |            |            |
| 1227.5884                             | C <sub>56</sub> H <sub>93</sub> NO <sub>22</sub> | Esculeoside B         | R <sub>2</sub>                                    | N           | -   | -   | -   | -   | F-ring rearrangement |            |            |

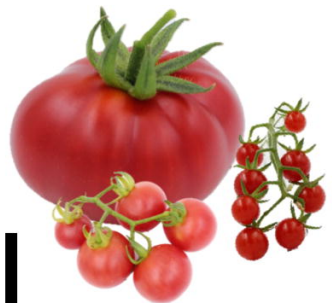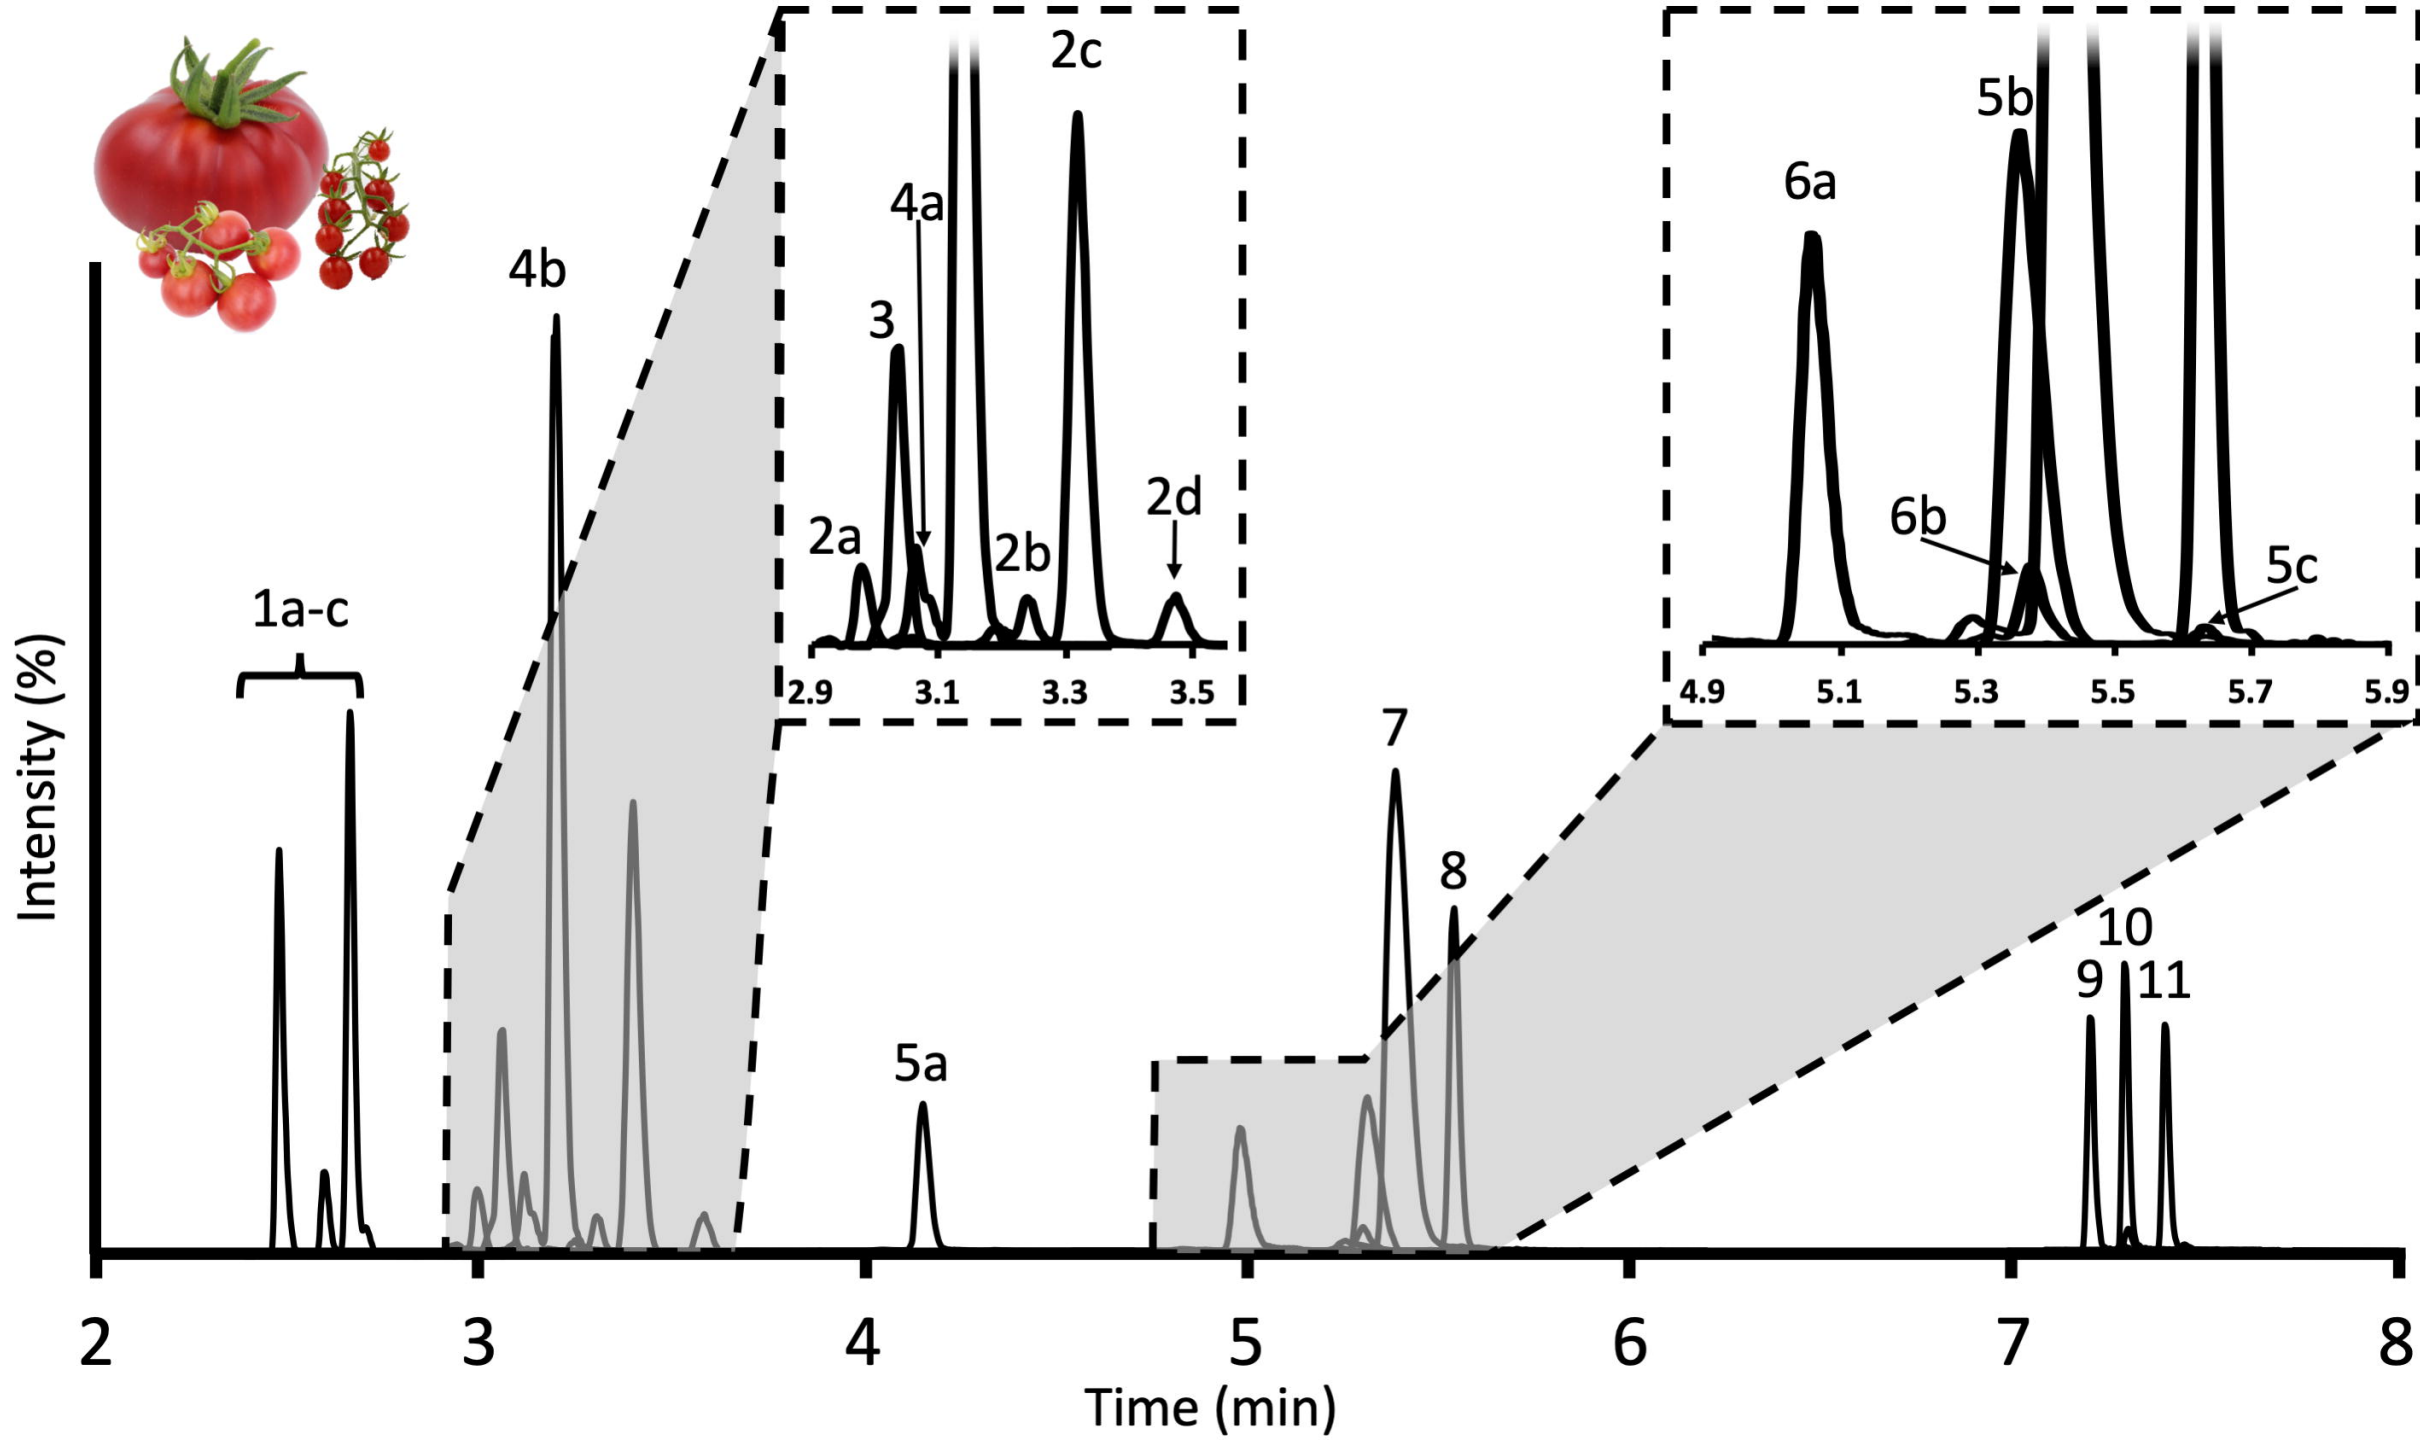

Source: https://www.biorxiv.org/content/10.1101/2019.12.23.878223v1.full.pdf
